# Supplementary material for: Carbamazepine Degradation Mediated by Light in the Presence of Humic Substances-Coated Magnetite Nanoparticles
Source: PubMed Central journal article supplement (PMC6836229; doi:10.3390/nano9101379), 2019-09-26
Supplement: nanomaterials-09-01379-s001.pdf [file nanomaterials-09-01379-s001.pdf]

## SUPPORTING INFORMATION

### **Carbamazepine degradation mediated by light in the presence of humic substances-coated magnetite nanoparticles.**

Francisca Aparicio, Juan Pablo Escalada, Eduardo De Gerónimo, Virginia C. Aparicio, Fernando S. García Einschlag, Giuliana Magnacca, Luciano Carlos, and Daniel O. Mártire

Number of pages: 7

Number of Figures: 7

Number of Tables: 1

#### **Contents:**

|                                                  |    |
|--------------------------------------------------|----|
| Emission spectrum of the lamps (Figure S1) ..... | S2 |
| TEM images (Figure S2) .....                     | S3 |
| XRD pattern (Figure S3) .....                    | S4 |
| TGA curve (Figure S4) .....                      | S4 |
| FT-IR spectrum (Figure S5) .....                 | S5 |
| UV-Vis absorption spectra (Figure S6) .....      | S6 |
| Magnetization curve (Figure S7) .....            | S6 |
| Reaction mechanism (Figure S8).....              | S7 |
| UPLC-MS/MS conditions for CBZ (Table S1).....    | S7 |

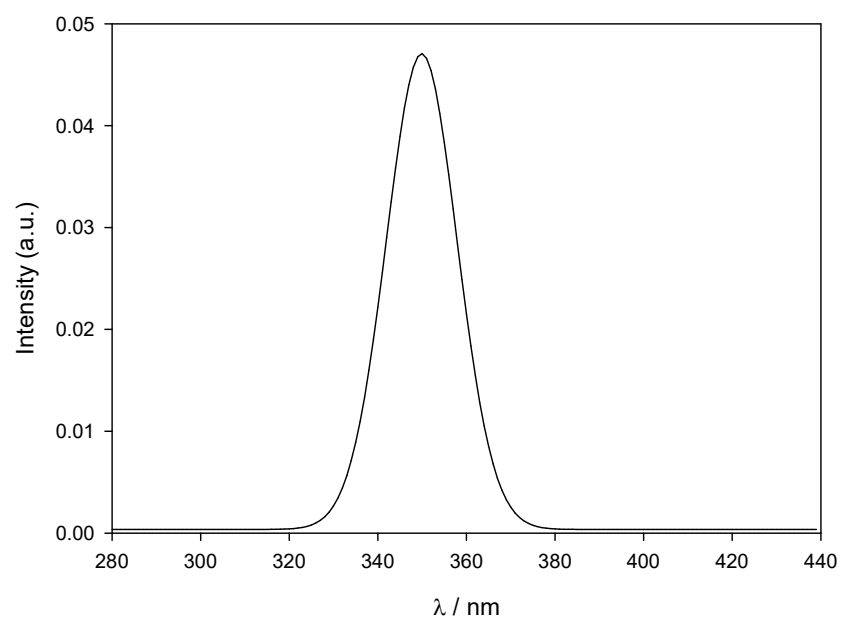

**Figure S1.** Emission spectrum of the lamps.

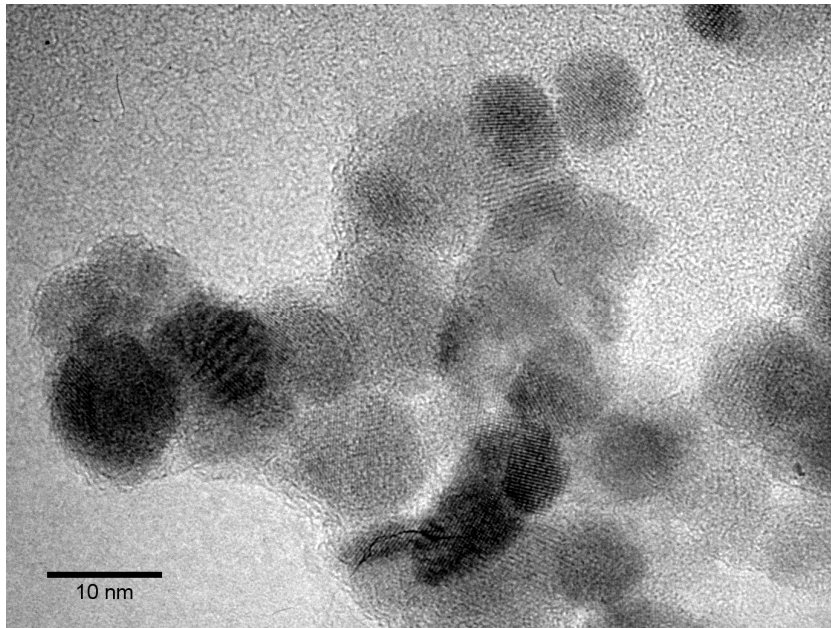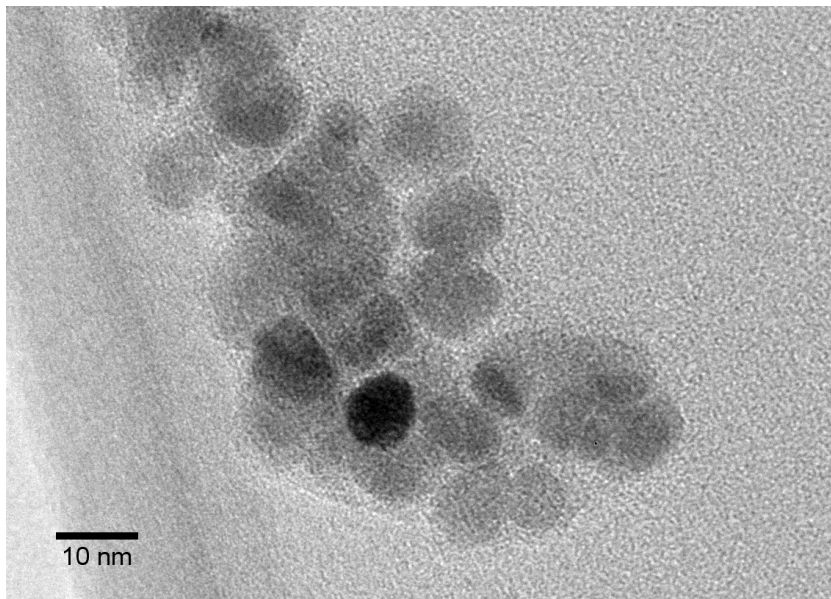

**Figure S2.** TEM images of Fe<sub>3</sub>O<sub>4</sub>/LHA.

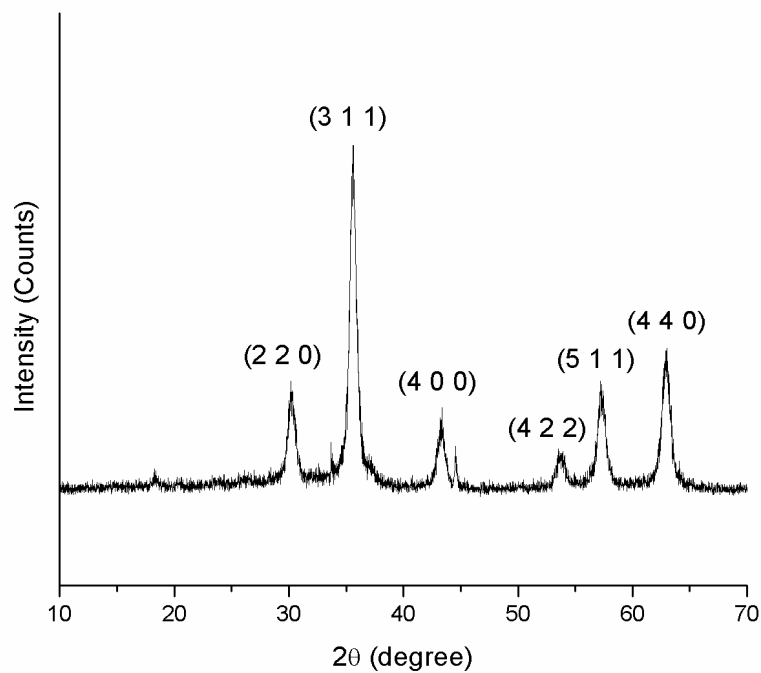

**Figure S3.** XRD pattern of  $\text{Fe}_3\text{O}_4/\text{LHA}$ . Magnetite/maghemite crystalline planes reflections are highlighted.

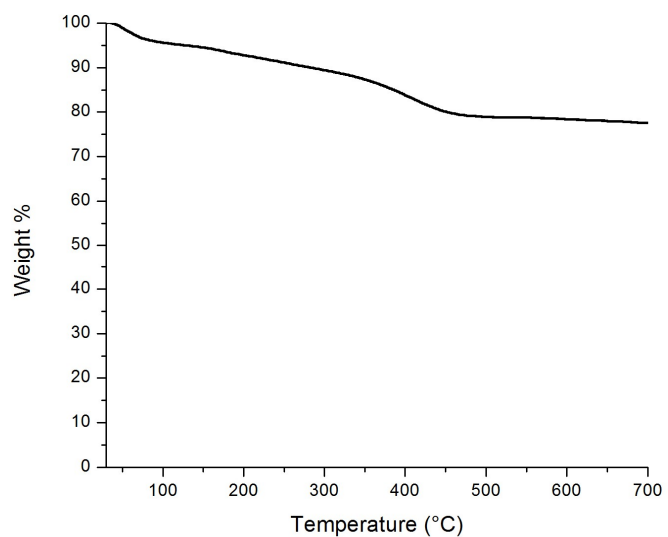

**Figure S4.** TGA curve obtained for  $\text{Fe}_3\text{O}_4/\text{LHA}$  under  $\text{N}_2$  atmosphere.

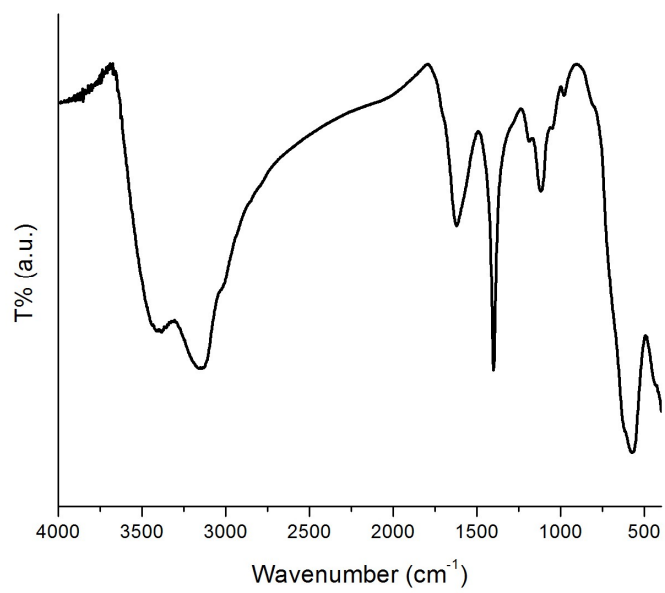

**Figure S5.** FT-IR spectra of Fe<sub>3</sub>O<sub>4</sub>/LHA nanoparticles.

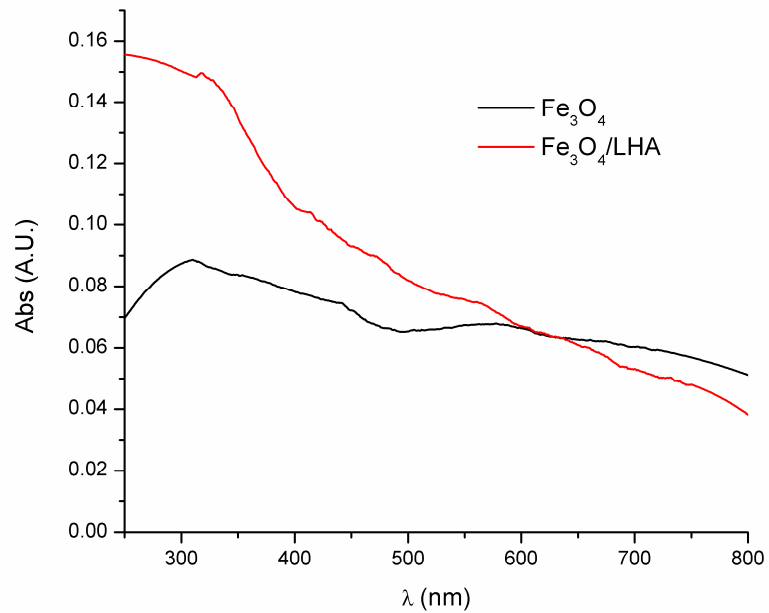

**Figure S6.** UV-Vis absorption spectra of  $\text{Fe}_3\text{O}_4$  and  $\text{Fe}_3\text{O}_4/\text{LHA}$ .

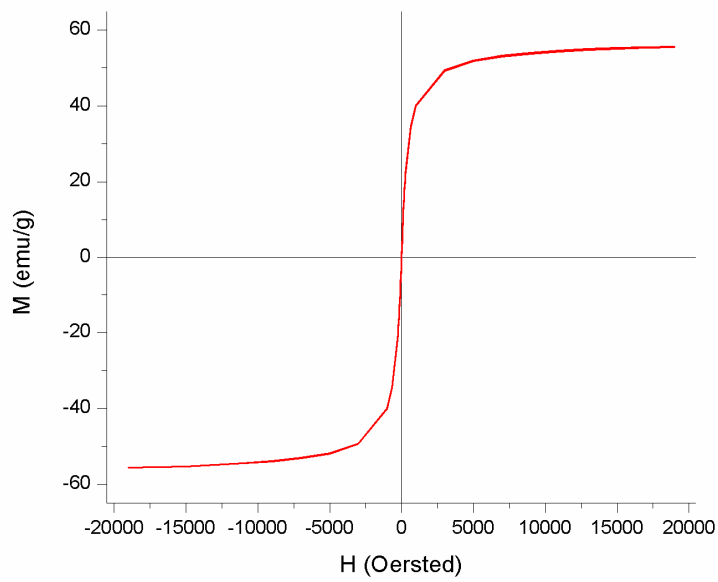

**Figure S7.** Magnetization curve of  $\text{Fe}_3\text{O}_4/\text{LHA}$ .

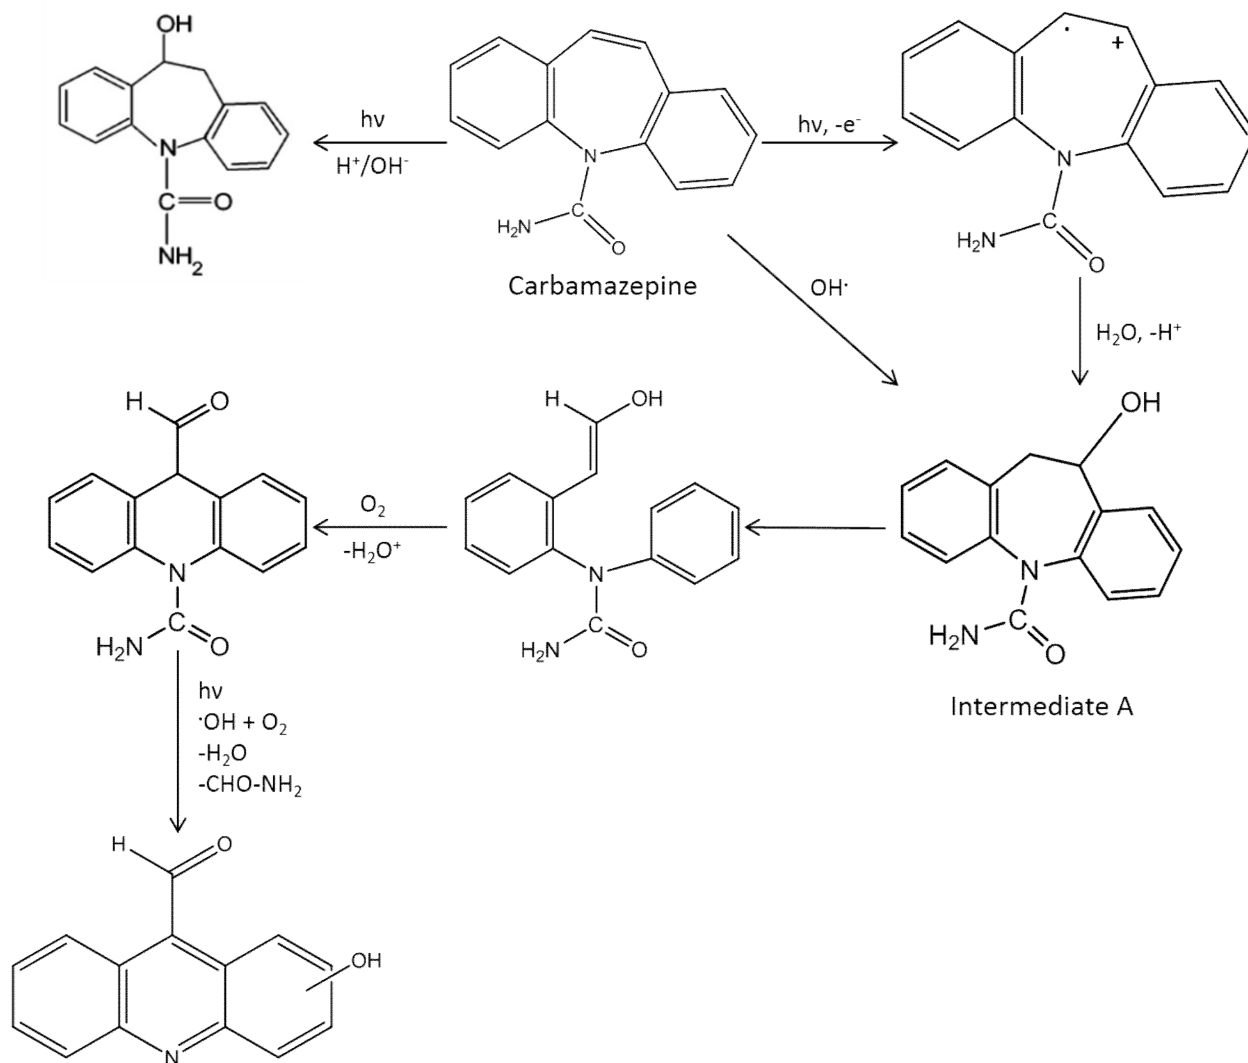

**Figure S8:** Reaction mechanism proposed for the formation of compound number IV.

**Table S1.** UPLC-MS/MS conditions for CBZ.

| Compound      | Cone voltage (V) | Precursor ion (m/z) | Quantification ion    |                   | Identification ion    |                   |
|---------------|------------------|---------------------|-----------------------|-------------------|-----------------------|-------------------|
|               |                  |                     | Collision energy (eV) | Product ion (m/z) | Collision energy (eV) | Product ion (m/z) |
| Carbamazepine | 26               | 236.8               | 20                    | 191.9             | 20                    | 193.9             |
